# Supplementary material for: The Characteristics and Mortality of Chinese Herbal Medicine Users among Newly Diagnosed Inoperable Huge Hepatocellular Carcinoma (≥10 cm) Patients: A Retrospective Cohort Study with Exploration of Core Herbs
Source: MDPI journal article supplement (doi:10.3390/ijerph191912480), 2022-09-30
Supplement: s1 [file s1]

**Supplementary Table S1.** Diagnosis codes used in the study

| Disease      | ICD-9-CM codes                     | ICD-10-CM codes                     |
|--------------|------------------------------------|-------------------------------------|
| Hypertension | 401-405                            | I10, I11                            |
| Diabetes     | 250.x, except 250.x1 and<br>250.x3 | E11                                 |
| Hepatitis B  | 07020-07023, 07030-70733           | B169, B1910, B162,<br>B1911, B181   |
| Hepatitis C  | 07041, 07044, 07051, 07054         | B1710, B1711, B182,<br>B1920, B1921 |
| Fatty liver  | 5718, 5719, 5710                   | K760, K7581, K700                   |
